# Supplementary material for: Novel Pt/CeO2/C catalysts for electrooxidation of alcohols in alkaline media
Source: Royal Society of Chemistry journal article supplement (doi:10.1039/b408589b), 2004-01-01
Supplement: b408589b.doc [file b408589b.doc]

**Supplementary data**

Novel Pt/CeO2/C catalysts for electrooxidation of alcohols in alkaline media

Changwei Xu and Pei Kang Shen*

State Key Laboratory of Optoelectronic Materials and Technologies, School of Physics and Engineering, Sun Yat-Sen University, Guangzhou 510275, P.R. China. Fax: 86-20-84113369; Tel: 86-20-84036736; E-mail: stdp32@zsu.edu.cn

**Catalyst preparation and characterization**

11.6 ml of 0.1 mol dm-3 Ce(NO3)3 aqueous solution mixed with 0.2 mg carbon black (Vulcan XC-72R, Cabot Corp., USA). K2CO3(1 mol dm-3 aqueous solution) was added into the mixture to form Ce2(CO3)3 precipitates. The precipitate was washed and dried in oven at 100oC. The mixture was put into a microwave oven and then be alternatively heated 20 seconds and paused 60 seconds for six times. Theoretically, 0.4 mg CeO2/C could be obtained. Pt-CeO2/C catalysts were prepared by the reduction of H2PtCl6 solution on CeO2/C powder. The ratios of Pt and CeO2 were calculated by the molar ratios of the precursors added assuming without lose during the preparation processes. Finally, the electrodes were made by dispersing the Pt/C or Pt-CeO2/C powders in 2-propanol with Nafion solution under ultrasonic stirring, then, the catalyst ink was deposited on the surface of a graphite rod with the geometric area of 0.50cm2 and dried at 80oC for 30 minutes. The Pt loadings on the Pt/C and Pt-CeO2/C electrodes were normally controlled at 0.3 mg cm-2. The unit of mg cm-2 used in the article is the geometric area of the electrode without accounts the surface area of the ceria. We normally use mg cm-2 to express the loadings of the components in the catalyst since the CeO2 is changeable.

The structure of the ceria was characterized by XRD and showed that ceria is a cubic crystallite. The XRD pattern of Pt-CeO2/C combined the crystalline features of Pt and CeO2, indicating the coexistence of both them.

Fig. S1 XRD patterns of CeO2/C, Pt/C and Pt-CeO2 /C.

The Pt-CeO2 /C samples were characterized by TEM. One of the typical TEM patterns is shown Fig. S2. The sample, in fact, is not uniformly dispersed. The optimization of the preparation method is in progress to further improve the performance of the catalysts.


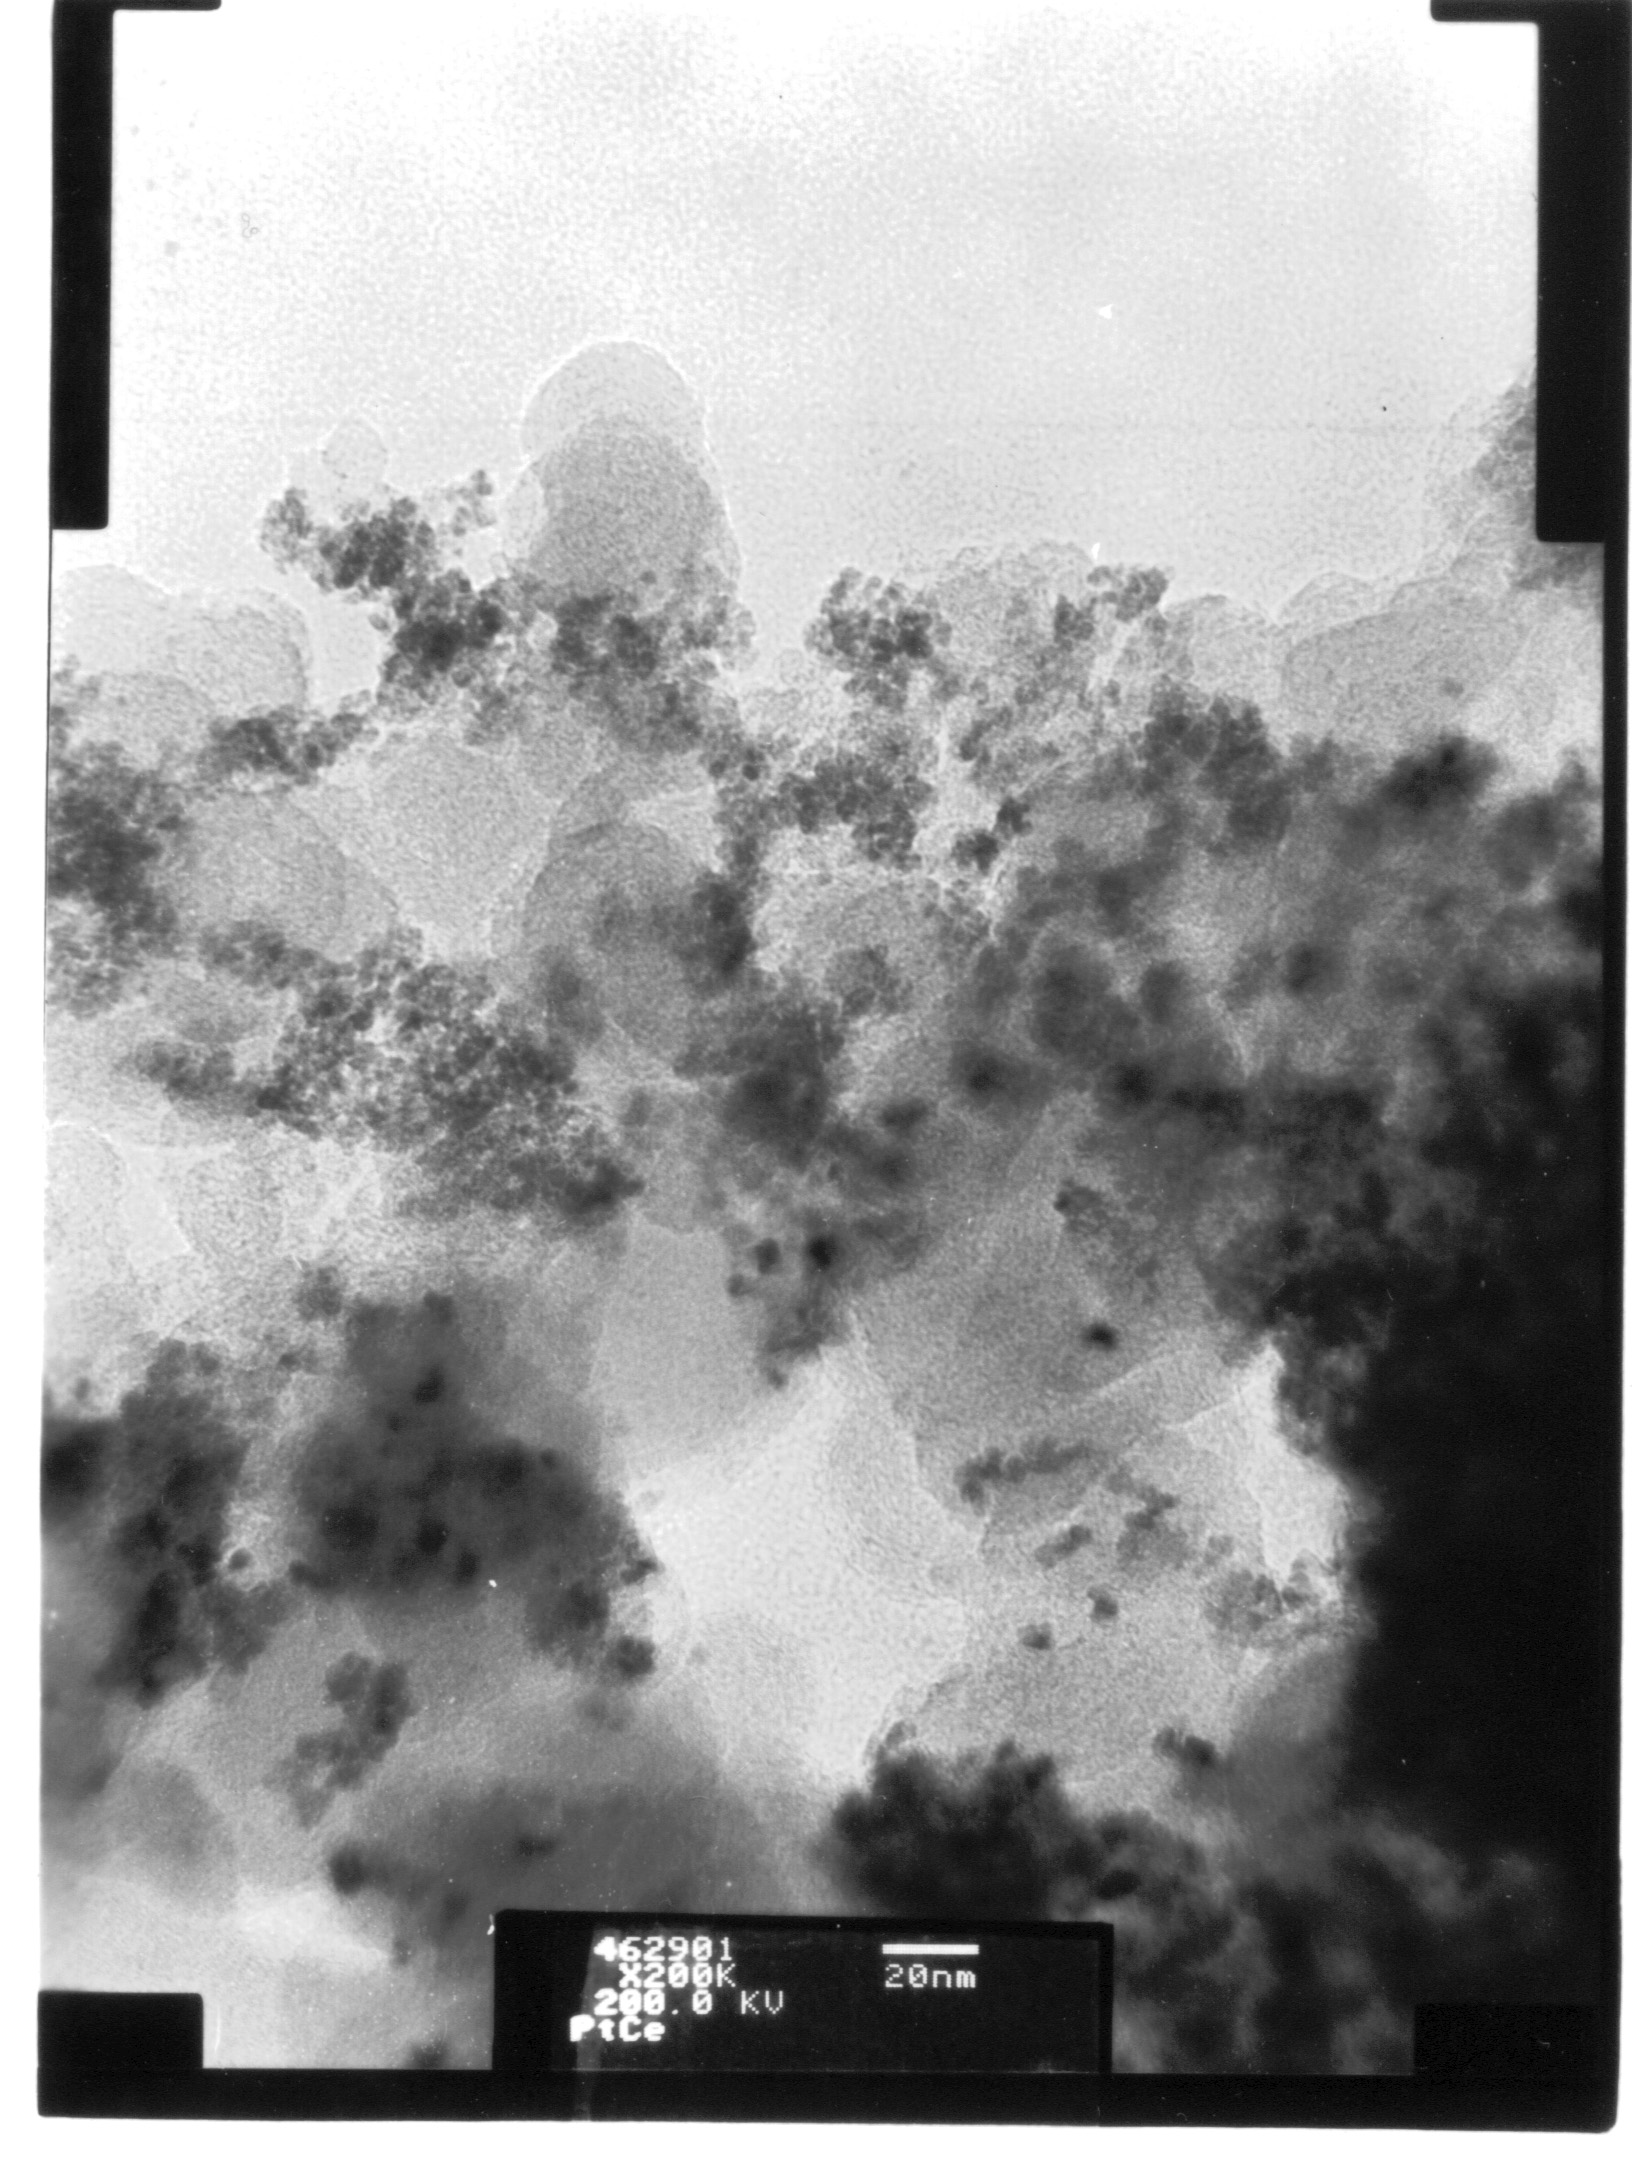


Fig. S2 TEM micrograph of Pt-CeO2 /C powder. (The bar in the photo is 20 nm).
